# Supplementary material
Source: Copernicus journal article supplement (doi:10.5194/tc-20-3559-2026)
Supplement: Supplementary file 1 [file tc-20-3559-2026-supplement.pdf]

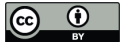

*Supplement of*

**30 m monthly glacier surface velocity mapping in the Kangri Karpo region (2015–2024) using multi-source remote sensing data fusion**

**Daoxun Gao et al.**

*Correspondence to:* Kunpeng Wu ([wukunpeng@ynu.edu.cn](mailto:wukunpeng@ynu.edu.cn))

The copyright of individual parts of the supplement might differ from the article licence.

## S1. Imagery List

Table S1. Landsat Imagery List

| Image Date | Previous interval | Representative Month |
|------------|-------------------|----------------------|
| 23/01/2015 |                   |                      |
| 24/02/2015 | 32                | 1,2                  |
| 12/03/2015 | 16                | 3                    |
| 13/04/2015 | 32                | 3                    |
| 18/07/2015 | 96                | 4,5,6,7              |
| 04/09/2015 | 48                | 8                    |
| 06/10/2015 | 32                | 9                    |
| 09/12/2015 | 64                | 10,11                |
| 25/12/2015 | 16                | 12                   |
| 10/01/2016 | 16                | 1                    |
| 27/02/2016 | 48                | 1,2                  |
| 30/03/2016 | 32                | 3                    |
| 02/06/2016 | 64                | 4,5                  |
| 21/08/2016 | 80                | 6,7,8                |
| 24/10/2016 | 64                | 9,10                 |
| 25/11/2016 | 32                | 11                   |
| 11/12/2016 | 16                | 12                   |
| 13/02/2017 | 64                | 1                    |
| 01/03/2017 | 16                | 2                    |
| 18/04/2017 | 48                | 3                    |
| 05/06/2017 | 48                | 4                    |
| 23/07/2017 | 48                | 5,6,7                |
| 25/09/2017 | 64                | 8,9                  |
| 27/10/2017 | 32                | 10                   |
| 12/11/2017 | 16                | 11                   |
| 14/12/2017 | 32                | 12                   |
| 30/12/2017 | 16                | 12                   |
| 31/01/2018 | 32                | 1                    |

|            |     |            |
|------------|-----|------------|
| 16/02/2018 | 16  | 2          |
| 20/03/2018 | 32  | 3          |
| 08/06/2018 | 80  | 4,5        |
| 28/09/2018 | 112 | 6,7,8,9    |
| 30/10/2018 | 32  | 12         |
| 01/12/2018 | 32  | 11         |
| 02/01/2019 | 32  | 12         |
| 24/02/2019 | 53  | 1,2        |
| 14/08/2019 | 176 | 3,4,5,6,7  |
| 17/10/2019 | 64  | 8,9        |
| 02/11/2019 | 16  | 10         |
| 04/12/2019 | 32  | 11         |
| 06/02/2020 | 64  | 12,1       |
| 09/03/2020 | 32  | 2          |
| 25/03/2020 | 16  | 3          |
| 26/04/2020 | 32  | 4          |
| 28/05/2020 | 32  | 5          |
| 01/09/2020 | 96  | 6,7,8      |
| 22/12/2020 | 112 | 9,10,11,12 |
| 23/01/2021 | 32  | 1          |
| 08/02/2021 | 16  | 1,2        |
| 24/02/2021 | 16  | 2          |
| 12/03/2021 | 16  | 2,3        |
| 28/03/2021 | 16  | 3          |
| 29/04/2021 | 32  | 4          |
| 20/09/2021 | 144 | 5,6,7,8,9  |
| 07/11/2021 | 48  | 10         |
| 09/12/2021 | 32  | 11         |
| 25/12/2021 | 16  | 12         |
| 03/02/2022 | 40  | 1          |
| 07/03/2022 | 32  | 2          |
| 15/03/2022 | 8   | 3          |
| 02/05/2022 | 48  | 4          |

|            |     |         |
|------------|-----|---------|
| 05/07/2022 | 64  | 5,6     |
| 15/09/2022 | 72  | 7,8     |
| 10/11/2022 | 56  | 9,10    |
| 28/12/2022 | 48  | 11,12   |
| 29/01/2023 | 32  | 1       |
| 02/03/2023 | 32  | 2       |
| 03/04/2023 | 32  | 3       |
| 06/06/2023 | 64  | 4,5     |
| 30/06/2023 | 24  | 6       |
| 01/08/2023 | 32  | 7       |
| 09/08/2023 | 8   | 8       |
| 02/09/2023 | 24  | 8       |
| 04/10/2023 | 32  | 9       |
| 13/11/2023 | 40  | 10      |
| 29/11/2023 | 16  | 11      |
| 23/12/2023 | 24  | 12      |
| 08/01/2024 | 16  | 1       |
| 09/02/2024 | 32  | 1       |
| 13/04/2024 | 64  | 2,3     |
| 29/04/2024 | 16  | 4       |
| 19/08/2024 | 112 | 5,6,7,8 |
| 22/10/2024 | 64  | 9,10    |
| 09/12/2024 | 48  | 11      |
| 25/12/2024 | 16  | 12      |

**Table S2. Sentinel-1 Imagery List**

| <b>Image Date</b> | <b>Previous interval</b> | <b>Representative Month</b> |
|-------------------|--------------------------|-----------------------------|
| 09/01/2015        |                          |                             |
| 21/01/2015        | 12                       | 1                           |
| 26/02/2015        | 36                       | 2                           |
| 27/04/2015        | 60                       | 3,4                         |
| 02/06/2015        | 36                       | 5                           |
| 08/07/2015        | 36                       | 6                           |

|            |    |       |
|------------|----|-------|
| 01/08/2015 | 24 | 7     |
| 25/08/2015 | 24 | 8     |
| 12/10/2015 | 48 | 9     |
| 29/11/2015 | 48 | 10,11 |
| 23/12/2015 | 24 | 12    |
| 09/02/2016 | 48 | 1     |
| 04/03/2016 | 24 | 2     |
| 28/03/2016 | 24 | 3     |
| 21/04/2016 | 24 | 4     |
| 08/06/2016 | 48 | 5     |
| 26/07/2016 | 48 | 6,7   |
| 19/08/2016 | 24 | 8     |
| 06/10/2016 | 48 | 9     |
| 30/10/2016 | 24 | 10    |
| 23/11/2016 | 24 | 11    |
| 17/12/2016 | 24 | 12    |
| 03/02/2017 | 48 | 1     |
| 27/02/2017 | 24 | 2     |
| 04/04/2017 | 36 | 3     |
| 28/04/2017 | 24 | 4     |
| 03/06/2017 | 36 | 5     |
| 27/06/2017 | 24 | 6     |
| 02/08/2017 | 36 | 7     |
| 26/08/2017 | 24 | 8     |
| 13/10/2017 | 48 | 9     |
| 06/11/2017 | 24 | 10    |
| 30/11/2017 | 24 | 11    |
| 24/12/2017 | 24 | 12    |
| 29/01/2018 | 36 | 1     |
| 06/03/2018 | 36 | 2     |
| 30/03/2018 | 24 | 3     |
| 05/05/2018 | 36 | 4     |
| 29/05/2018 | 24 | 5     |

|            |    |    |
|------------|----|----|
| 04/07/2018 | 36 | 6  |
| 28/07/2018 | 24 | 7  |
| 02/09/2018 | 36 | 8  |
| 26/09/2018 | 24 | 9  |
| 01/11/2018 | 36 | 10 |
| 25/11/2018 | 24 | 11 |
| 31/12/2018 | 36 | 12 |
| 05/02/2019 | 36 | 1  |
| 01/03/2019 | 24 | 2  |
| 25/03/2019 | 24 | 3  |
| 30/04/2019 | 36 | 4  |
| 24/05/2019 | 24 | 5  |
| 29/06/2019 | 36 | 6  |
| 23/07/2019 | 24 | 7  |
| 28/08/2019 | 36 | 8  |
| 21/09/2019 | 24 | 9  |
| 27/10/2019 | 36 | 10 |
| 02/12/2019 | 36 | 11 |
| 26/12/2019 | 24 | 12 |
| 31/01/2020 | 36 | 1  |
| 24/02/2020 | 24 | 2  |
| 31/03/2020 | 36 | 3  |
| 24/04/2020 | 24 | 4  |
| 30/05/2020 | 36 | 5  |
| 23/06/2020 | 24 | 6  |
| 29/07/2020 | 36 | 7  |
| 03/09/2020 | 36 | 8  |
| 27/09/2020 | 24 | 9  |
| 02/11/2020 | 36 | 10 |
| 08/12/2020 | 36 | 11 |
| 20/12/2020 | 12 | 12 |
| 25/01/2021 | 36 | 1  |
| 14/03/2021 | 48 | 2  |

|            |     |        |
|------------|-----|--------|
| 26/03/2021 | 12  | 3      |
| 01/05/2021 | 36  | 4      |
| 25/05/2021 | 24  | 5      |
| 30/06/2021 | 36  | 6      |
| 24/07/2021 | 24  | 7      |
| 29/08/2021 | 36  | 8      |
| 04/10/2021 | 36  | 9      |
| 28/10/2021 | 24  | 10     |
| 27/12/2021 | 60  | 11,12  |
| 01/02/2022 | 36  | 1      |
| 25/02/2022 | 24  | 2      |
| 02/04/2022 | 36  | 3      |
| 26/04/2022 | 24  | 4      |
| 08/05/2022 | 12  | 5      |
| 01/06/2022 | 24  | 6      |
| 12/08/2022 | 72  | 7      |
| 05/09/2022 | 24  | 8      |
| 29/09/2022 | 24  | 9      |
| 04/11/2022 | 36  | 10     |
| 28/11/2022 | 24  | 11     |
| 10/12/2022 | 12  | 12     |
| 28/03/2023 | 108 | 1,2,3  |
| 03/05/2023 | 36  | 4      |
| 27/05/2023 | 24  | 5      |
| 02/07/2023 | 36  | 6      |
| 07/08/2023 | 36  | 7      |
| 30/10/2023 | 84  | 8,9,10 |
| 05/12/2023 | 36  | 11     |
| 29/12/2023 | 24  | 12     |
| 22/01/2024 | 24  | 1      |
| 27/02/2024 | 36  | 2      |
| 03/04/2024 | 36  | 3      |
| 27/04/2024 | 24  | 4      |

|            |    |    |
|------------|----|----|
| 14/06/2024 | 48 | 5  |
| 08/07/2024 | 24 | 6  |
| 01/08/2024 | 24 | 7  |
| 06/09/2024 | 36 | 8  |
| 12/10/2024 | 36 | 9  |
| 05/11/2024 | 24 | 10 |
| 29/11/2024 | 24 | 11 |
| 23/12/2024 | 24 | 12 |

**Table S3. Sentinel-2 Imagery List**

| <b>Image Date</b> | <b>Previous interval</b> | <b>Representative Month</b> |
|-------------------|--------------------------|-----------------------------|
| 15/08/2015        |                          |                             |
| 13/11/2015        | 90                       | 8,9,10                      |
| 23/11/2015        | 10                       | 11                          |
| 23/12/2015        | 30                       | 12                          |
| 22/01/2016        | 30                       | 1                           |
| 11/05/2016        | 110                      | 2,3,4                       |
| 30/07/2016        | 80                       | 5,6,7                       |
| 19/08/2016        | 20                       | 8                           |
| 28/09/2016        | 40                       | 9                           |
| 28/10/2016        | 30                       | 10                          |
| 07/12/2016        | 40                       | 11                          |
| 17/12/2016        | 10                       | 12                          |
| 05/02/2017        | 50                       | 1                           |
| 06/04/2017        | 60                       | 2,3                         |
| 05/06/2017        | 60                       | 4,5                         |
| 15/07/2017        | 40                       | 6                           |
| 04/08/2017        | 20                       | 7                           |
| 13/09/2017        | 40                       | 8                           |
| 18/10/2017        | 35                       | 9                           |
| 28/10/2017        | 10                       | 10                          |
| 27/11/2017        | 30                       | 11                          |
| 27/12/2017        | 30                       | 12                          |

|            |     |           |
|------------|-----|-----------|
| 31/01/2018 | 35  | 1         |
| 25/02/2018 | 25  | 2         |
| 01/04/2018 | 35  | 3         |
| 26/04/2018 | 25  | 4         |
| 05/06/2018 | 40  | 5         |
| 05/07/2018 | 30  | 6         |
| 25/07/2018 | 20  | 7         |
| 29/08/2018 | 35  | 8         |
| 18/09/2018 | 20  | 9         |
| 02/11/2018 | 45  | 10        |
| 27/11/2018 | 25  | 11        |
| 01/01/2019 | 35  | 12        |
| 31/01/2019 | 30  | 1         |
| 02/03/2019 | 30  | 2         |
| 06/04/2019 | 35  | 3         |
| 26/04/2019 | 20  | 4         |
| 05/06/2019 | 40  | 5         |
| 20/07/2019 | 45  | 6,7       |
| 03/10/2019 | 75  | 8,9       |
| 28/10/2019 | 25  | 10        |
| 27/11/2019 | 30  | 11        |
| 06/01/2020 | 40  | 12        |
| 26/01/2020 | 20  | 1         |
| 25/02/2020 | 30  | 2         |
| 31/03/2020 | 35  | 3         |
| 10/05/2020 | 40  | 4         |
| 02/09/2020 | 115 | 5,6,7,8   |
| 01/12/2020 | 90  | 9,10,11   |
| 31/12/2020 | 30  | 12        |
| 25/01/2021 | 25  | 1         |
| 26/03/2021 | 60  | 2,3       |
| 30/04/2021 | 35  | 4         |
| 12/10/2021 | 165 | 5,6,7,8,9 |

|            |     |        |
|------------|-----|--------|
| 21/12/2021 | 70  | 10,11  |
| 05/01/2022 | 15  | 12     |
| 30/01/2022 | 25  | 1      |
| 20/04/2022 | 80  | 2,3,4  |
| 25/05/2022 | 35  | 5      |
| 12/09/2022 | 110 | 6,7,8  |
| 01/11/2022 | 50  | 9,10   |
| 01/12/2022 | 30  | 11     |
| 05/01/2023 | 35  | 12     |
| 30/01/2023 | 25  | 1      |
| 01/03/2023 | 30  | 2      |
| 31/03/2023 | 30  | 3      |
| 30/05/2023 | 60  | 4,5    |
| 29/07/2023 | 60  | 6,7    |
| 02/09/2023 | 35  | 8      |
| 01/11/2023 | 60  | 9,10   |
| 01/12/2023 | 30  | 11     |
| 31/12/2023 | 30  | 12     |
| 04/02/2024 | 35  | 1      |
| 10/03/2024 | 35  | 2      |
| 30/03/2024 | 20  | 3      |
| 29/04/2024 | 30  | 4      |
| 19/05/2024 | 20  | 5      |
| 12/08/2024 | 85  | 6,7    |
| 10/11/2024 | 90  | 8,9,10 |
| 30/11/2024 | 20  | 11     |
| 25/12/2024 | 25  | 12     |

---

## S2. Fuse Result

2015

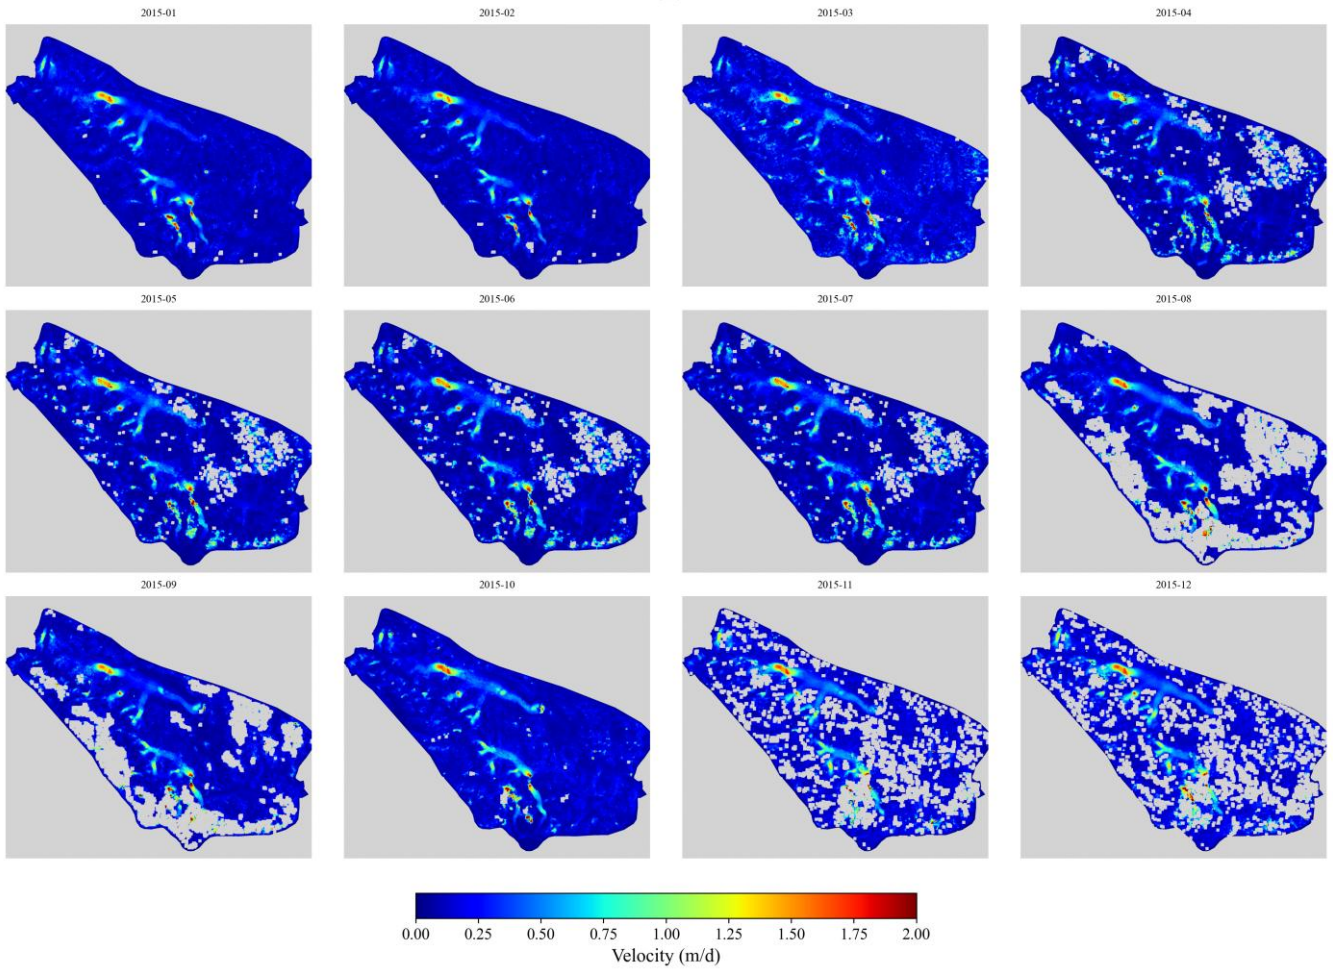

**Figure S1: Fused glacier surface velocity for 2015**

2016

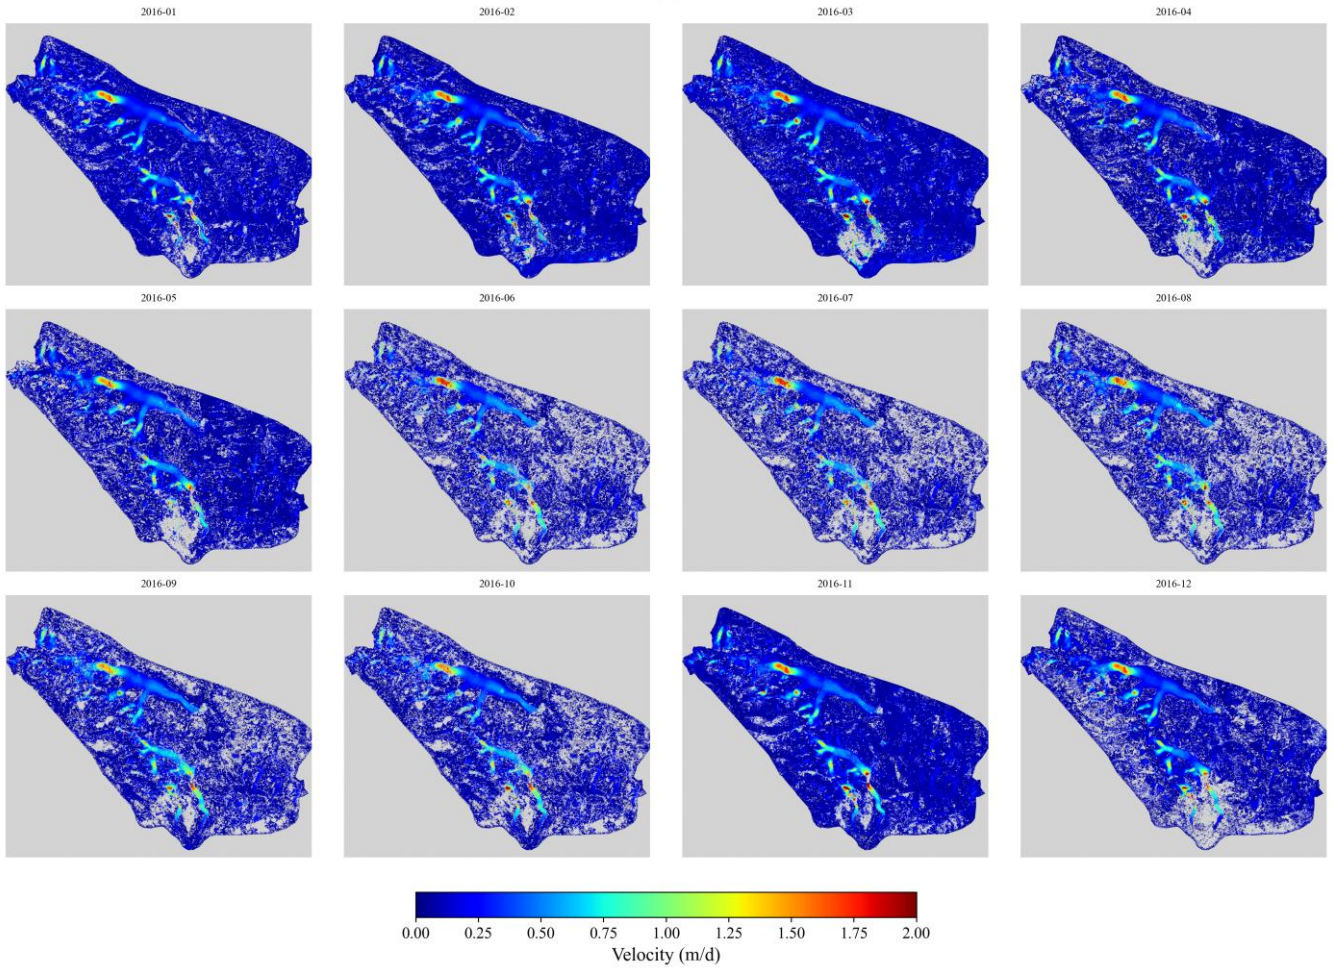

**Figure S2: Fused glacier surface velocity for 2016**

2017

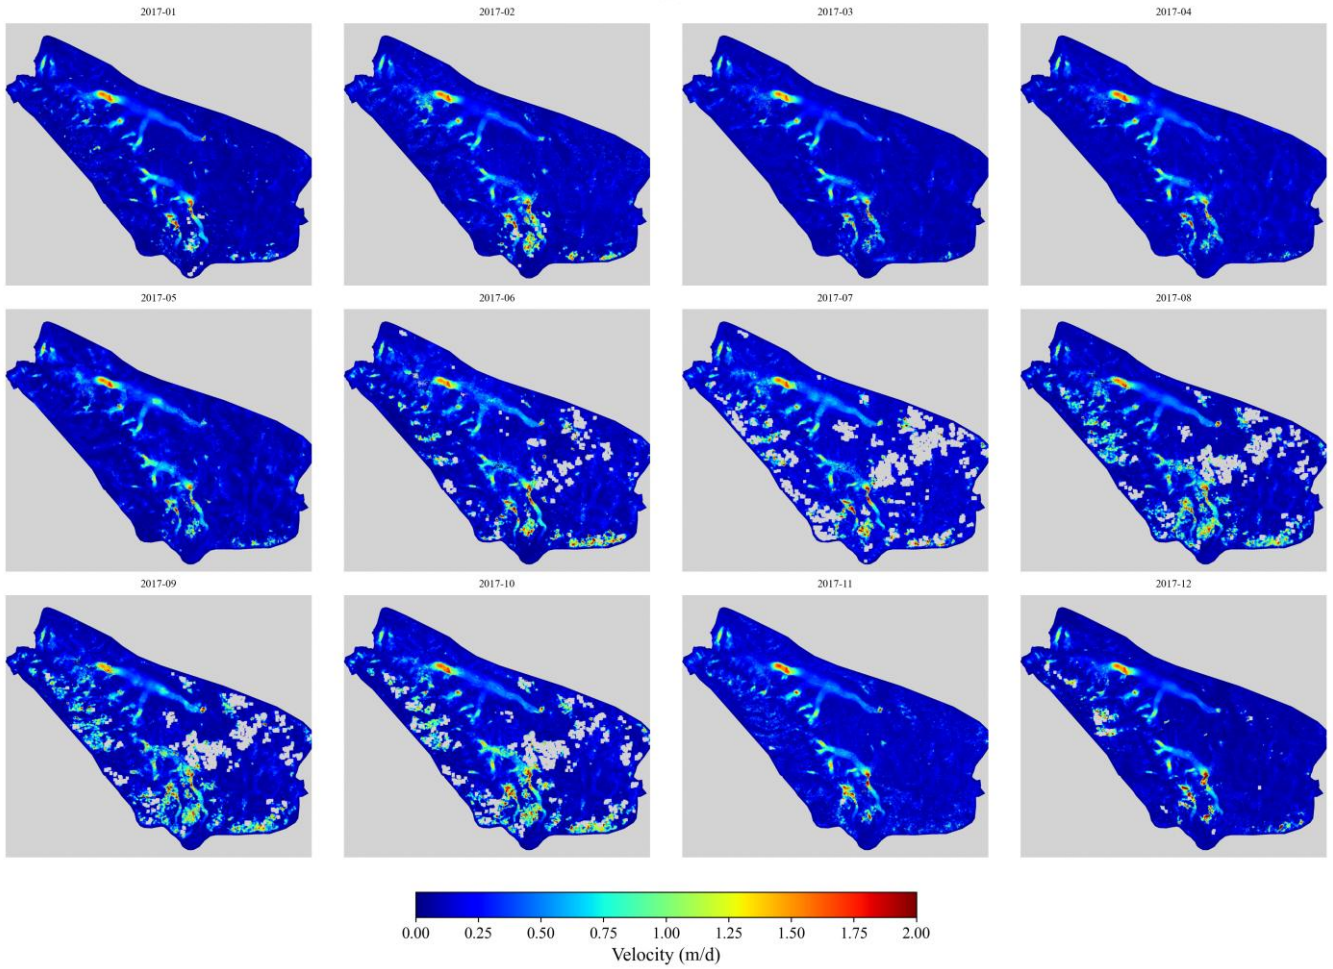

**Figure S3: Fused glacier surface velocity for 2017**

2018

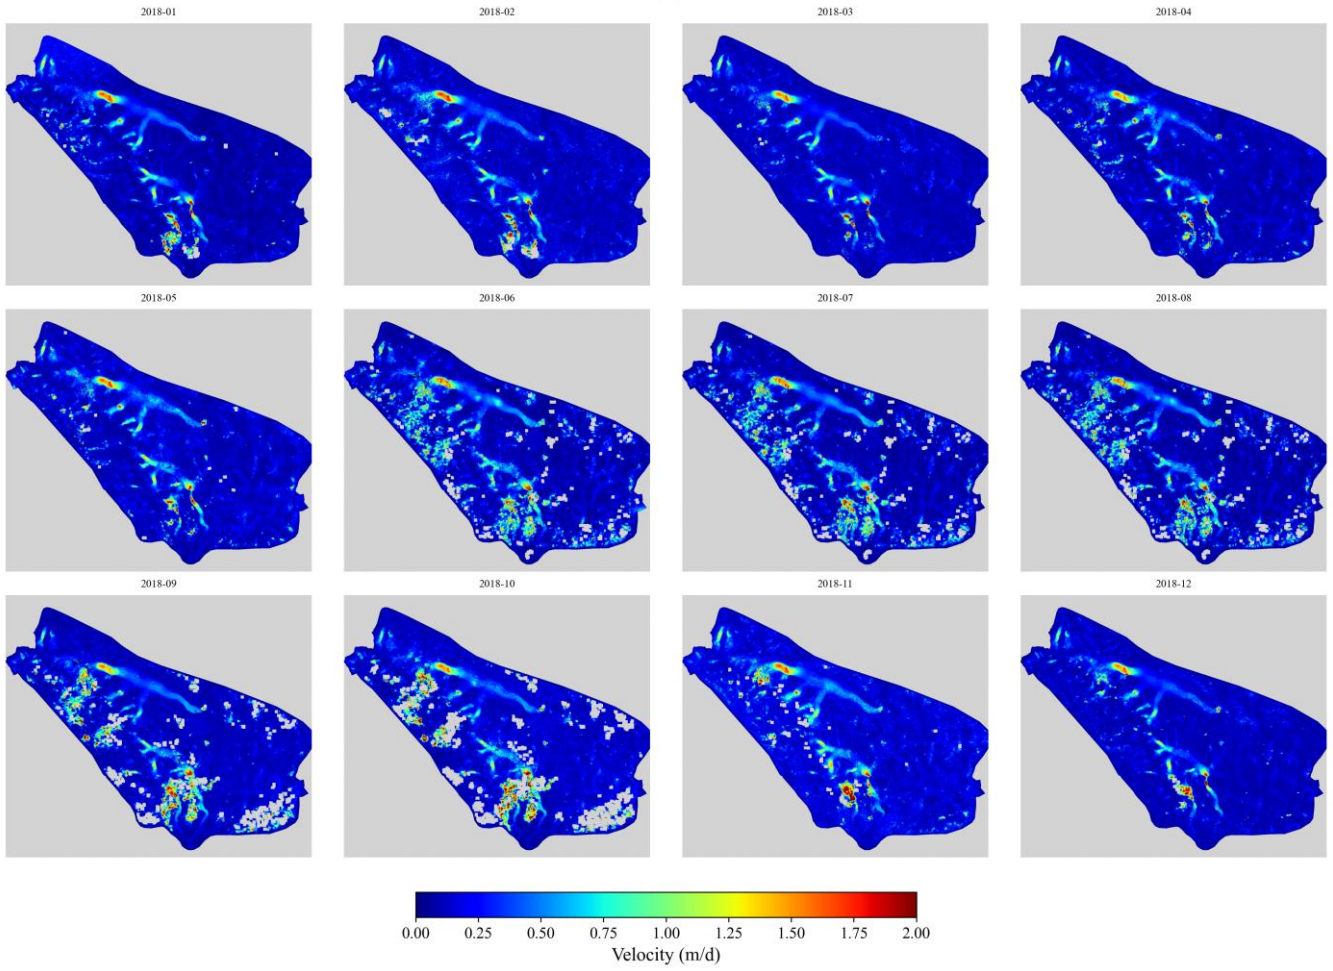

**Figure S4: Fused glacier surface velocity for 2018**

2019

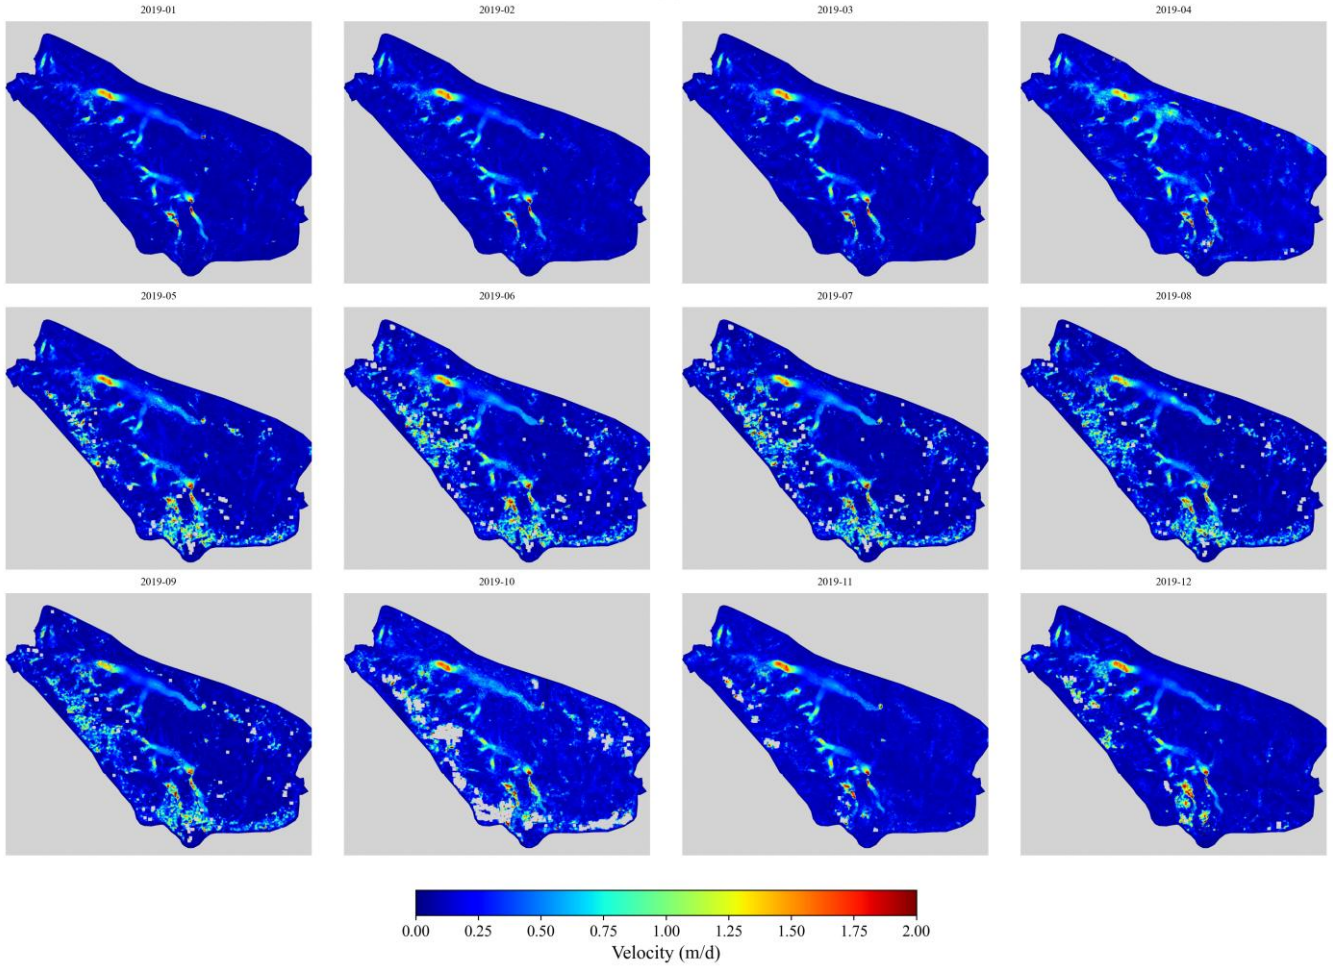

**Figure S5: Fused glacier surface velocity for 2019**

2020

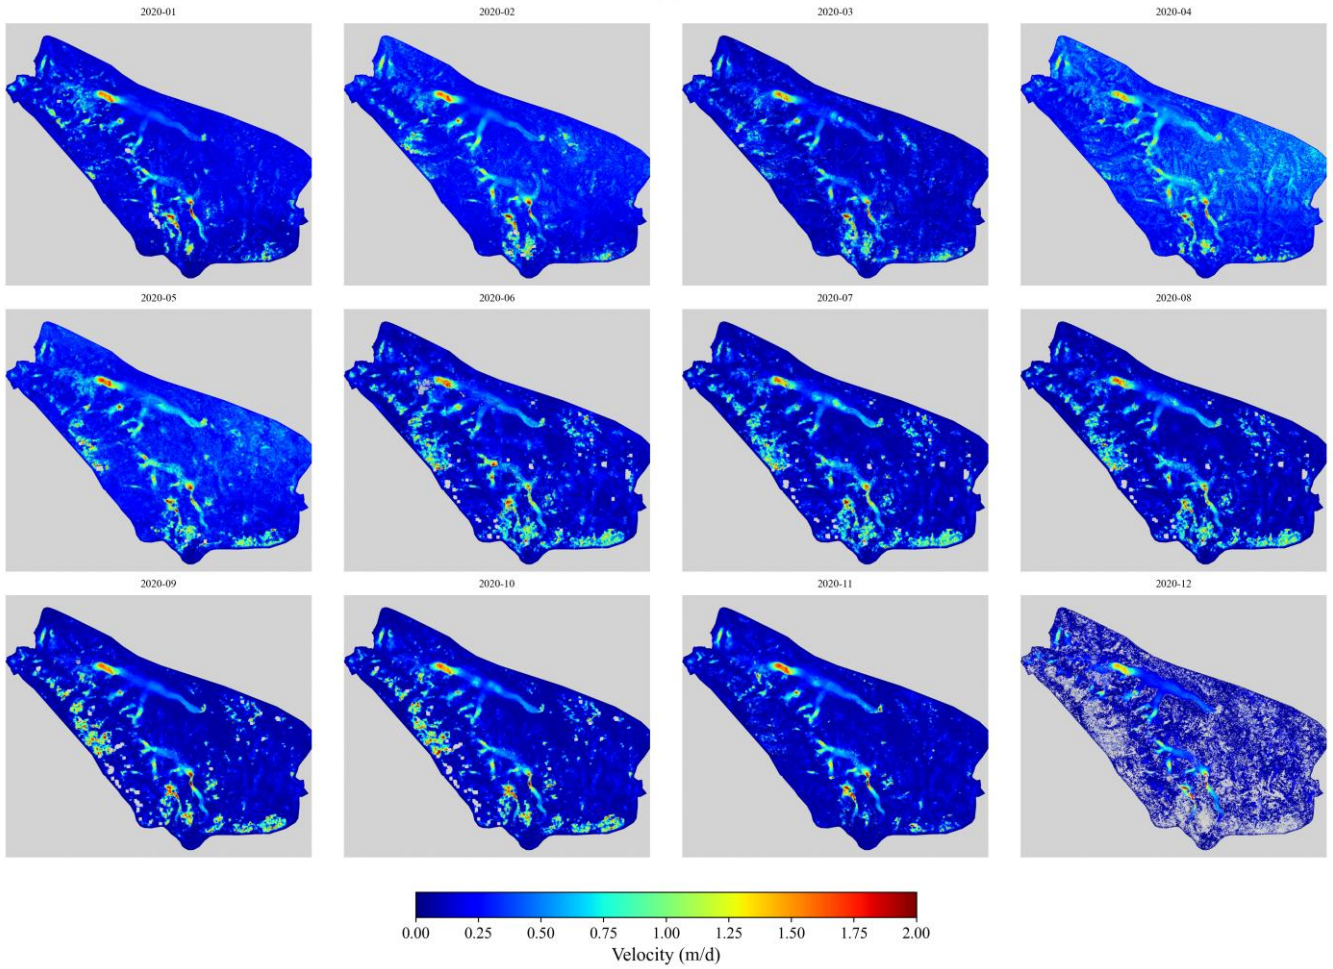

**Figure S6: Fused glacier surface velocity for 2020**

2021

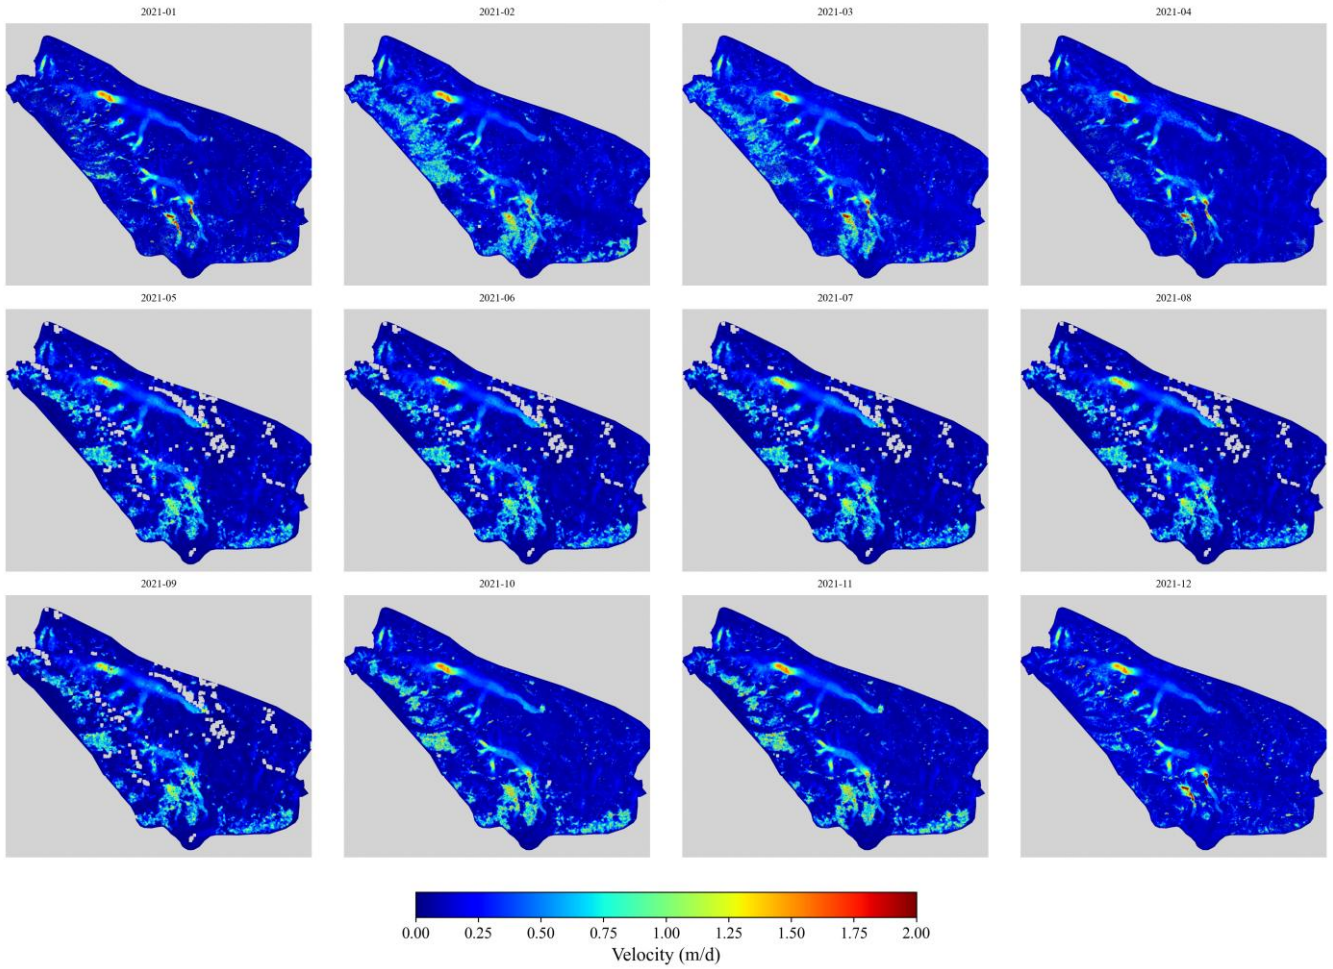

**Figure S7: Fused glacier surface velocity for 2021**

2022

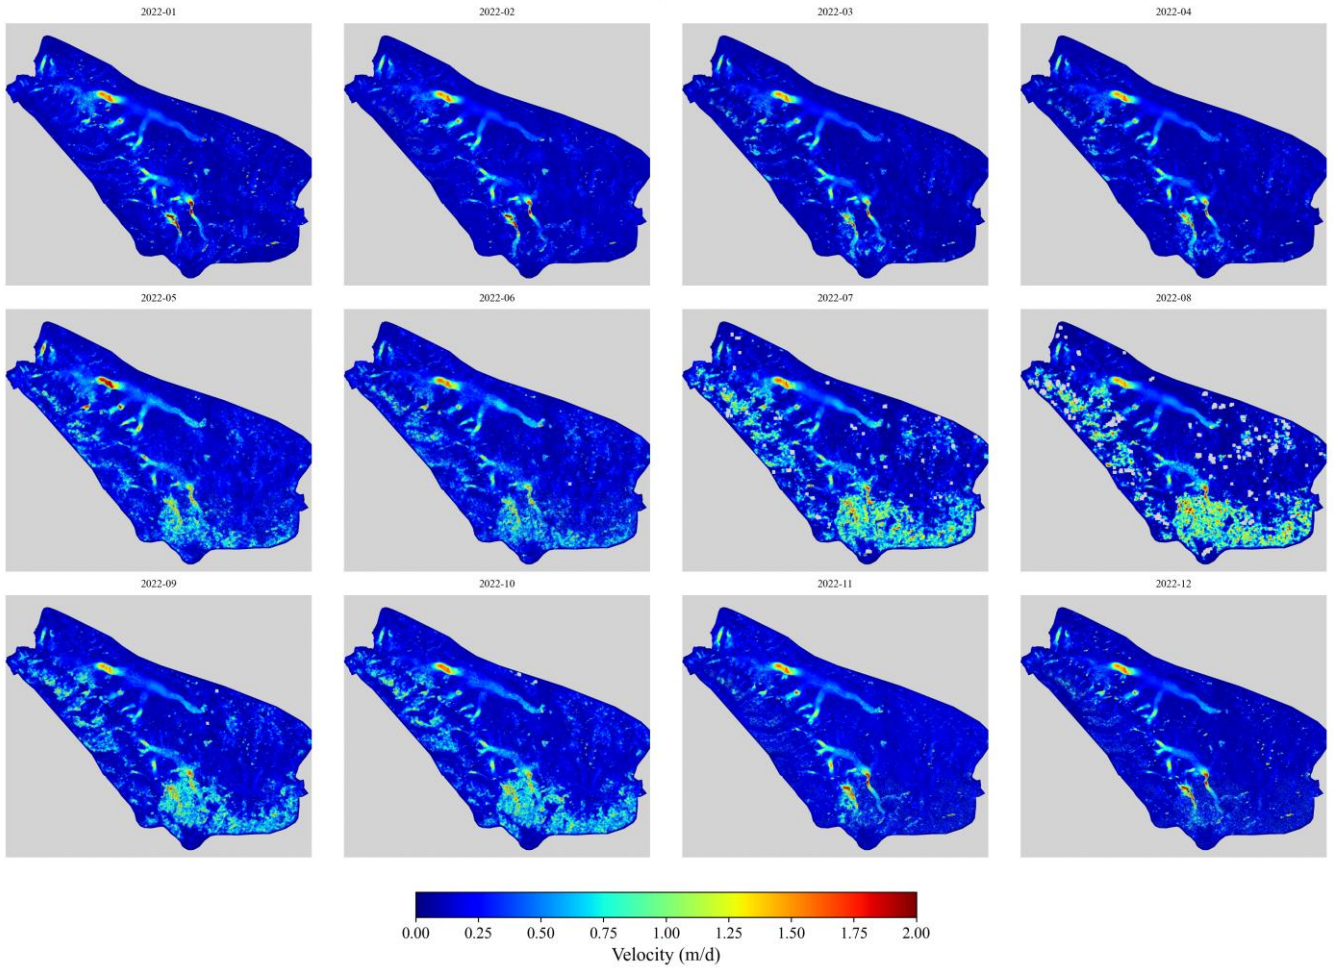

**Figure S8: Fused glacier surface velocity for 2022**

2023

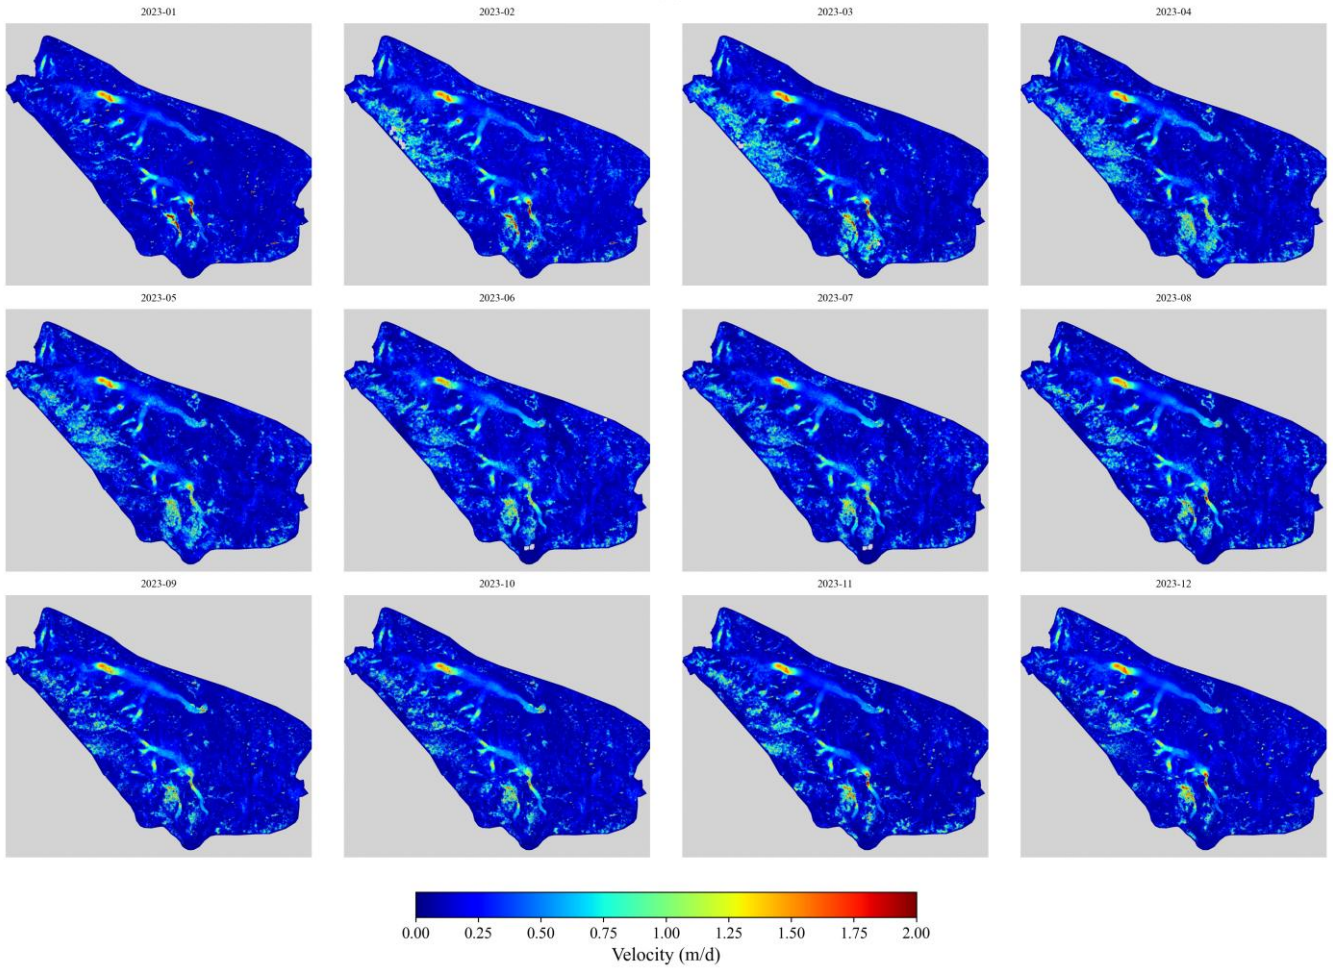

**Figure S9: Fused glacier surface velocity for 2023**

2024

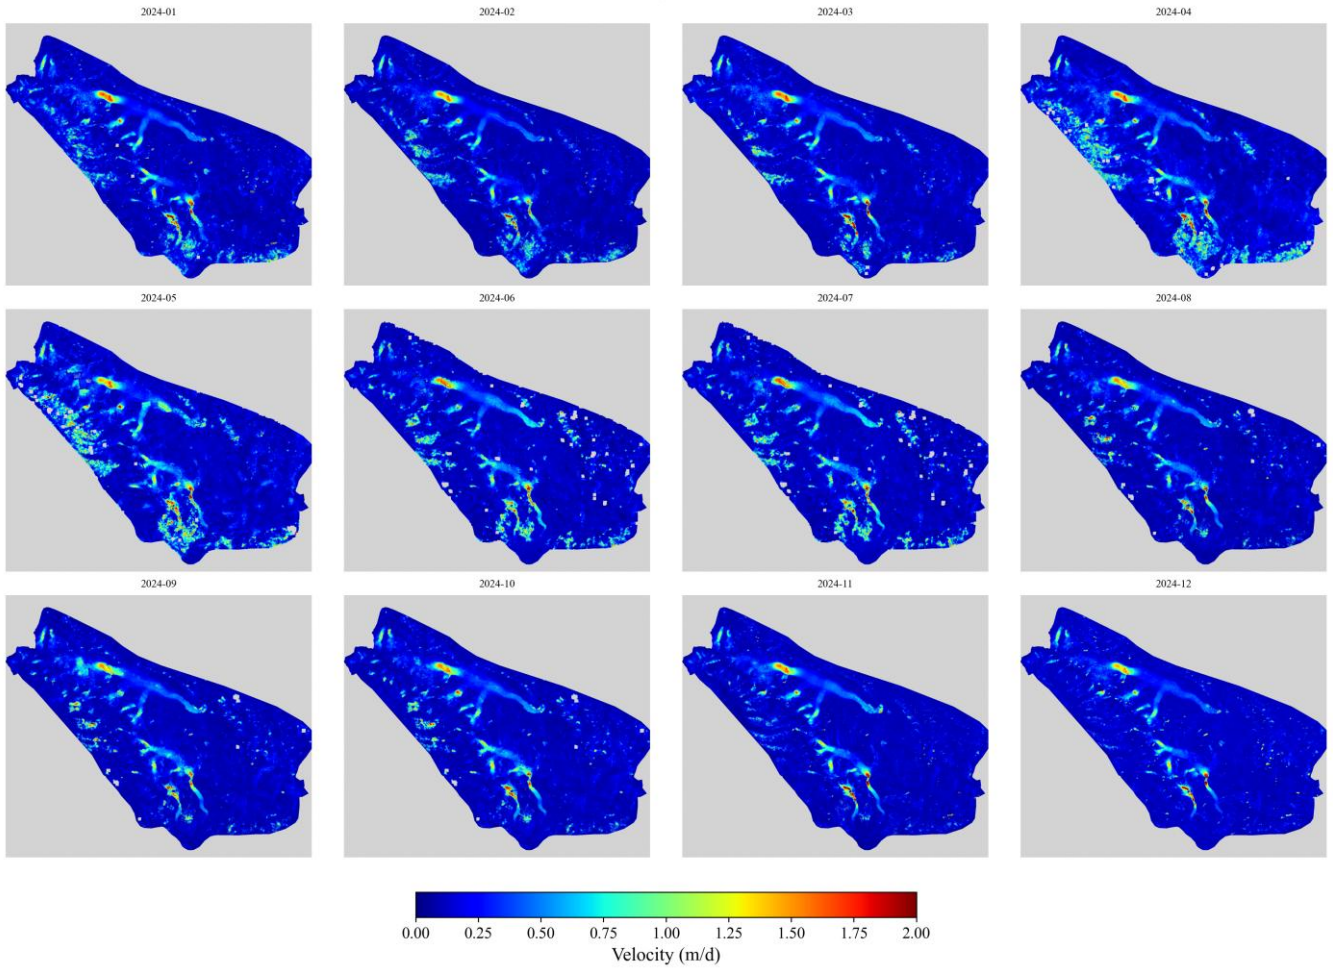

**Figure S10: Fused glacier surface velocity for 2024**
